# Supplementary material for: Neuroprotective effects of probiotics on anxiety- and depression-like disorders in stressed mice by modulating tryptophan metabolism and the gut microbiota
Source: Royal Society of Chemistry journal article supplement (doi:10.1039/d3fo03897a), 2024-01-01

## Cover sheet of the Supporting Information

### Neuroprotective effect of probiotic on anxiety- and depression-like disorders in stressed mice by modulating tryptophan metabolism and gut microbiota

Longgang Jia,<sup>a</sup> Ling Xiao,<sup>a</sup> Yao Fu,<sup>a</sup> Zhen Shao,<sup>a</sup> Zhaoxuan Jing,<sup>a</sup> Jiahu Yuan,<sup>a</sup> Yufeng Xie,<sup>a,b</sup> Jun Guo,<sup>a</sup> Yanping Wang,<sup>\*a</sup> Weitao Geng<sup>\*a</sup>

<sup>a</sup> State Key Laboratory of Food Nutrition and Safety, College of Food Science and Engineering, Tianjin University of Science & Technology, Tianjin, 300457, P. R. China

<sup>b</sup> College of Food Science and Engineering, Harbin University, Harbin 150086, P. R. China

#### \* Corresponding Authors:

\* Weitao Geng; Phone: +86-22-60912442; Fax: +86-22-60912442; E-mail: gengwt@tust.edu.cn

\* Yanping Wang; Phone: +86-22-60912442; Fax: +86-22-60912442; E-mail: ypwang@tust.edu.cn

Number of pages: 5 (including the cover sheet)

Number of supplemental tables: 0

Number of supplemental figures: 4

Figure S1. Effects of *Lactiplantibacillus plantarum* D-9 on the body weight of CUMS mice.

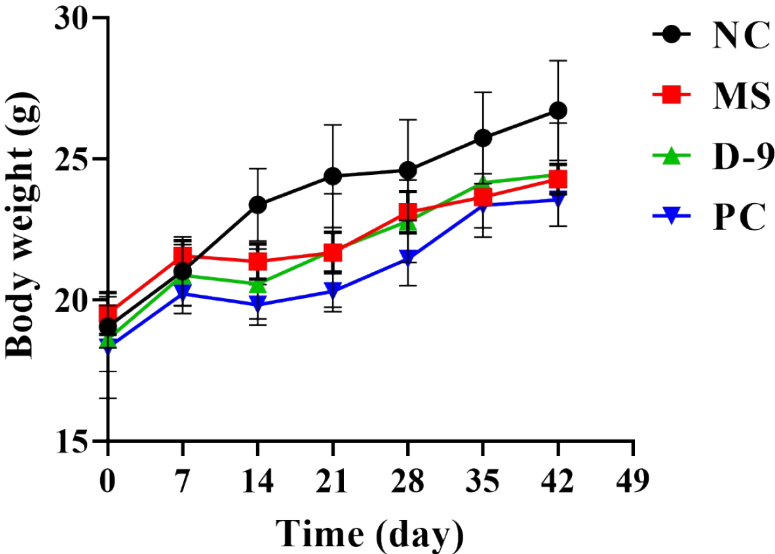

**Figure S2.** Construction of the CUMS model. (A) SPT analysis. (B) Movement trajectory, (C) upright and cross-grid numbers, and (D) time-consuming in central area in the OFT. (E) EPM analysis. (F) TST analysis. (G) FST analysis. The values represent means  $\pm$  SEM (n = 8). \*  $p < 0.05$ , \*\*  $p < 0.01$ , \*\*\*  $p < 0.001$ .

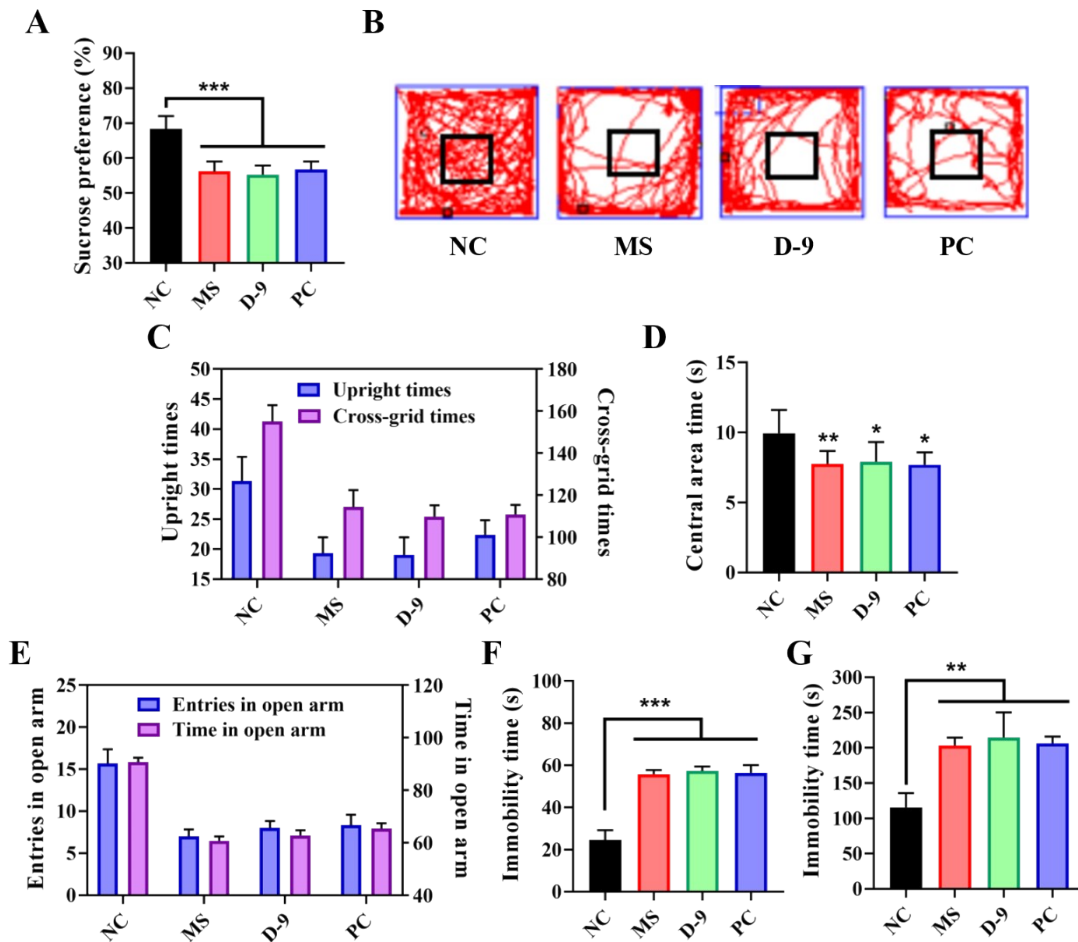

**Figure S3.** Concentrations of GABA in (A) hippocampus, (B) blood and (C) feces that measured using ELISA kit. \*  $p < 0.05$ , \*\*  $p < 0.01$ , \*\*\*  $p < 0.001$ , compared to the NC group. #  $p < 0.05$ , ##  $p < 0.01$ , ###  $p < 0.001$ , compared to the MS group.

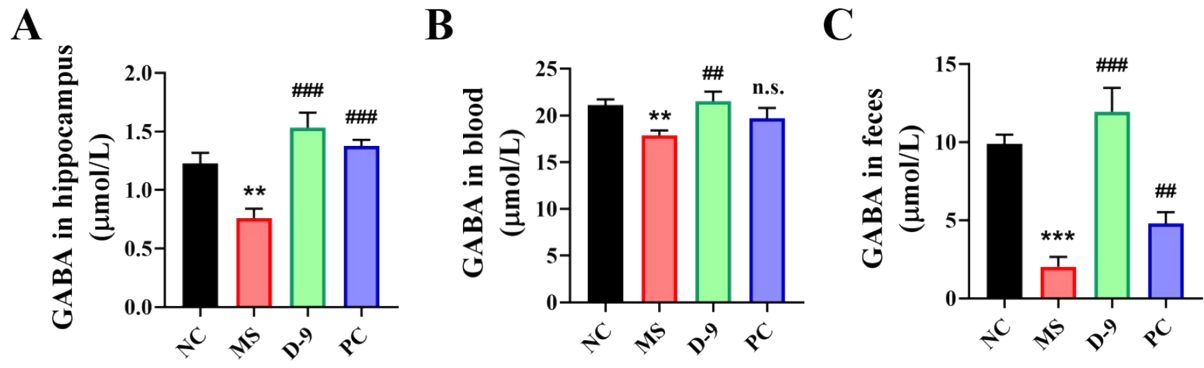

**Figure S4.** Clean tags and operational taxonomic units (OTUs) in NC, MS, D-9 and PC groups analyzed by 16S rRNA gene sequencing.

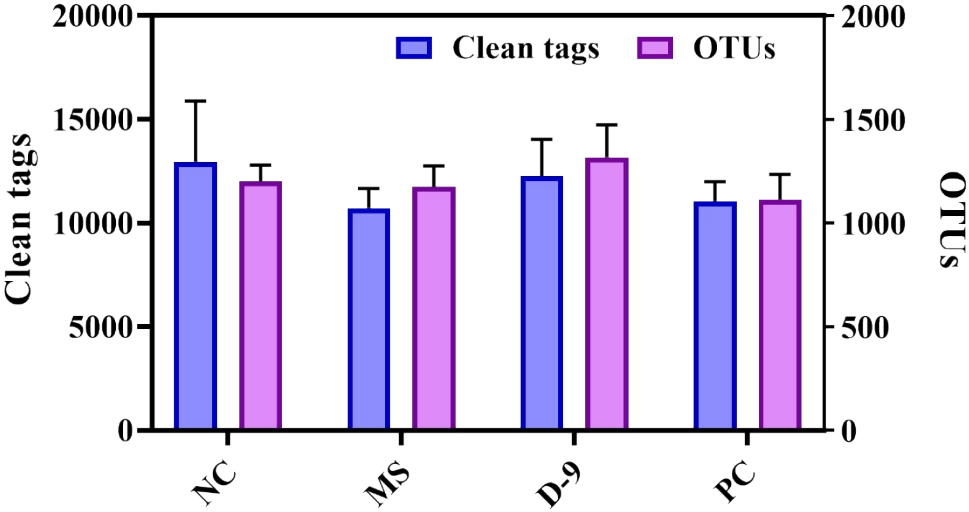

Supplement: d3fo03897a1.pdf [file d3fo03897a1.pdf]
